# Supplementary material
Source: publisher figshare collection journal article supplement (https://wiley.figshare.com/ndownloader/files/33661439)
Supplement: Supplementary file 1 [file 33661439]

## Sheet: A4_PCBs_2019-06-01
Reference	Samp. Date	Species	Locations	Tissue	Coelutions	Σ-PCB	SE_Σ_PCB	PCB 118	SE_PCB_118	PCB 105	SE_PCB_105	PCB 128	SE_PCB_128	PCB 180	SE_PCB_180	PCB 153	SE_PCB_153	PCB 101	SE_PCB_101	PCB 138	SE_PCB_138	PCB 170	SE_PCB_170	PCB 187	SE_PCB_187	PCB 194	SE_PCB_194	PCB 206	SE_PCB_206	PCB 66	SE_PCB_66	PCB 82	SE_PCB_82	PCB 149	SE_PCB_149	PCB 28	SE_PCB_28	PCB 52	SE_PCB_52	PCB 99	SE_PCB_99	PCB 87	SE_PCB_87	PCB 146	SE_PCB_146	PCB 199	SE_PCB_199	PCB 209	SE_PCB_209
Alam & Brim 2000	1992	Cc	Florida, U.S.	whole egg	60+56, 118+108+149	3.56		0.2		0.4		0.27		0.16		0.16				0.2								0.16		0.24												0.19						0.2
Alam & Brim 2000	1992	Cc	Florida, U.S.	whole egg	60+56, 118+108+149	3.74		0.21		0.38		0.3		0.16						0.24								0.22		0.22												0.18						0.19
Mckenzie et al. 1999	1995	Cc	Cyprus, Med. Sea	whole egg		89		7.2						12		29		1.2		14																0.4		2.7
Mckenzie et al. 1999	1995	Cm	Cyprus, Med. Sea	whole egg		6.1		0.15						0.15		0.15		1.1		0.15																0.3		2.2
Alava et al. 2006	2002	Cc	S Florida, U.S.	yolk	138+163, 151+82	135.6	225	17.095	1.065	3.043	1.286	2.397	0.788	9.317	1.006	51.683	4.306			32.006	2.141	4.042	0.42	3.238	1.005	0.593	0.214	0.803	0.216	0.424	0.204	1.824	1.939	0.382	0.14					3.027	1.792			2.227	0.289			0.4	0.072
Alava et al. 2011	2002	Cc	W Florida, U.S.	yolk	138+163	2.73	1.187	0.29	0.111	0.1	0.036	0.08	0.0246	0.23	0.0918	1.17	0.488			0.28	0.136	0.08	0.0265	0.1	0.0379	0.05	0.0156			0.09										0.15	0.0573			0.03	0.0159	0.06	0.0139
Alava et al. 2011	2002	Cc	E.Florida, U.S.	yolk	138+163	27.53	10.952	3.05	1.524	1.5	0.74	0.75	0.333	1.9	0.762	8.95	3.182			4.28	1.991	0.52	1.931	1.09	0.503	0.2	0.0629			0.19	0.0851									1.6	0.777			0.46	0.229	0.32	0.0977
Alava et al. 2011	2002	Cc	N Carolina, U.S.	yolk	138+163	108.19	36.53	12.23	4.15	4.66	1.778	3.46	1.178	5.04	1.571	27.49	9.263			19.86	7.188	1.87	0.608	6.45	2.29	0.57	0.158			1.44	0.459									5.69	2.097			3.09	1.126	1.04	0.348
Munoz & Vermeiren 2018	2002	Ei	Celestun, Mex.	yolk	187+128			0.81	0.139	0.41	0.015	0.11	0.07	0.84	0.564	0.72	0	4.56	0	0.46	0.012	0.32	0.063	0.11	0.065			0	0	0.4	0.266					0.91	0.405	0.11	0.043			0.67	0.19					0.77	0.156
Munoz & Vermeiren 2018	2002	Ei	El cuyo, Mex.	yolk	187+128			0.36	0.117	0.18	0.035	0.73	0.065	0.53	0.088	0.52	0.159	0.2	0	0.09	0.041	0.4	0.225	0.73	0.384			0.21	0.017	0.45	0.113					0.81	0.451	0.34	0.188			0.39	0.194					0.19	0.074
Munoz & Vermeiren 2018	2002	Ei	Isla holbox, Mex.	yolk	187+128			0.1	0.049	0.42	0.115	1.55	0.47	0.22	0.12	0.16	0.035	0.54	0.389	0.59	0.243	0.22	0.079	1.55	0.47			0.04	0.003	0.79	0.338					0.48	0.372	0.14	0.079			1.08	0.27					0.11	0.039
Stewart et al. 2011	2003	Dc	Florida U.S.	whole egg	203+196, 180+193, 153+132	8.45	1.618	0.66	0.122	0.21	0.36	0.11	0.02	0.4	0.06	2.11	0.403	0.13	0.021	0.97	0.17	0.05	0.0126	0.68	0.153	0.35	0.009			0.17	0.029									0.35	0.059			0.34	0.067	0.15	0.055
van de Merwe et al. 2010	2004	Cc	Penninsular Malaysia	whole egg	138+158, 153+132, 180+193	0.5536	0.0546	0.0164	0.0013			0.0141	0.0012	0.0535	0.0075	0.0658	0.0131			0.0456	0.0089																			0.02
Guirlet et al. 2010	2006	Dc	French Guiana, Carib. Sea	whole egg	95+66, 105+153	6.98	0.11	0.4		0.11		0.09		0.26		1		0.94		0.77				0.09		0.08		0.08		1.4				0.14								0.33						0.08
Dyc et al. 2015	2008	Cm	Guadalupe, F.W.I.	yolk	66+95	4.47	0.56	0.08	0.02					0.07	0.02	0.24	0.02	0.3	0.07	0.22	0.07															1.1	0.2	0.87	0.24
Dyc et al. 2015	2008	Ei	Guadaloupe, F.W.I.	yolk	66+95	4.55		0						0		0		0.25		0.49																0		0.07
De Andres et al. 2016	2008	Dc	Costa Rica, Carib. Sea	yolk		5.29		0.39		0.14				1.25		1.42		0.3		0.59		0.22				0.01										0.3		0.41
Keller 2013b	2010	Cc	S Carolina-Georgia, U.S.	yolk	153+132, 180+193	40.53	13.284	7.13	3.383	1.3	0.406	1.22	0.455	1.91	0.578	13.65	3.996			5.38	1.667	0.82	0.24	2.67	0.812			1.187	0.978											3.78	1.636					1.51	1.181
[truncated: 66 more columns]
